# Supplementary material
Source: PubMed Central journal article supplement (PMC3880621)

## SUPPORTING INFORMATION

### **Synthesis and Chemical and Biological Comparison of Nitroxyl and Nitric Oxide Releasing Diazeniumdiolate-based Aspirin Derivatives**

*Debashree Basudhar,<sup>1</sup> Gaurav Bharadwaj,<sup>1</sup> Robert Y. Cheng,<sup>2</sup> Sarthak Jain,<sup>3</sup> Sa Shi,<sup>4,5</sup>  
Julie L. Heinecke,<sup>2</sup> Lisa A. Ridnour,<sup>2</sup> Viviane M. Caceres,<sup>4,6</sup> Ryan J. Holland,<sup>7</sup> Regina C.  
Spadari-Bratfisch,<sup>6</sup> Nazareno Paolocci,<sup>4,8</sup> Carlos A. Velázquez-Martínez,<sup>3</sup> David A.  
Wink<sup>2</sup> and Katrina M. Miranda<sup>1,\*</sup>*

<sup>1</sup>Department of Chemistry and Biochemistry, University of Arizona, Tucson, Arizona 85721, <sup>2</sup>Radiation Biology Branch, National Institutes of Health, Bethesda, Maryland 20892, <sup>3</sup>Faculty of Pharmacy and Pharmaceutical Sciences, University of Alberta, Edmonton, Canada, <sup>4</sup>Division of Cardiology, Department of Medicine, Johns Hopkins Medical Institutions, Baltimore, Maryland 21287, <sup>5</sup>Department of Pathophysiology, Harbin Medical University, Harbin, 150081, China; <sup>6</sup>Department of Biosciences, Federal University of São Paulo (UNIFESP), Santos, SP, Brazil, <sup>7</sup>Chemical Biology Laboratory, Frederick National Laboratory for Cancer Research, Frederick, Maryland 21702, <sup>8</sup>Department of Clinical and Experimental Medicine, University of Perugia, Perugia, Italy

## **Table of contents**

|                                                                                          |              |
|------------------------------------------------------------------------------------------|--------------|
| NMR spectra of products generated on hydrolysis of IPA/NO-aspirin<br>after 24 h at pH 10 | <b>S3</b>    |
| NMR spectra of products generated on hydrolysis of DEA/NO-aspirin<br>after 90 h at pH 10 | <b>S4</b>    |
| Assessment of compound purity by HPLC                                                    | <b>S5-S7</b> |

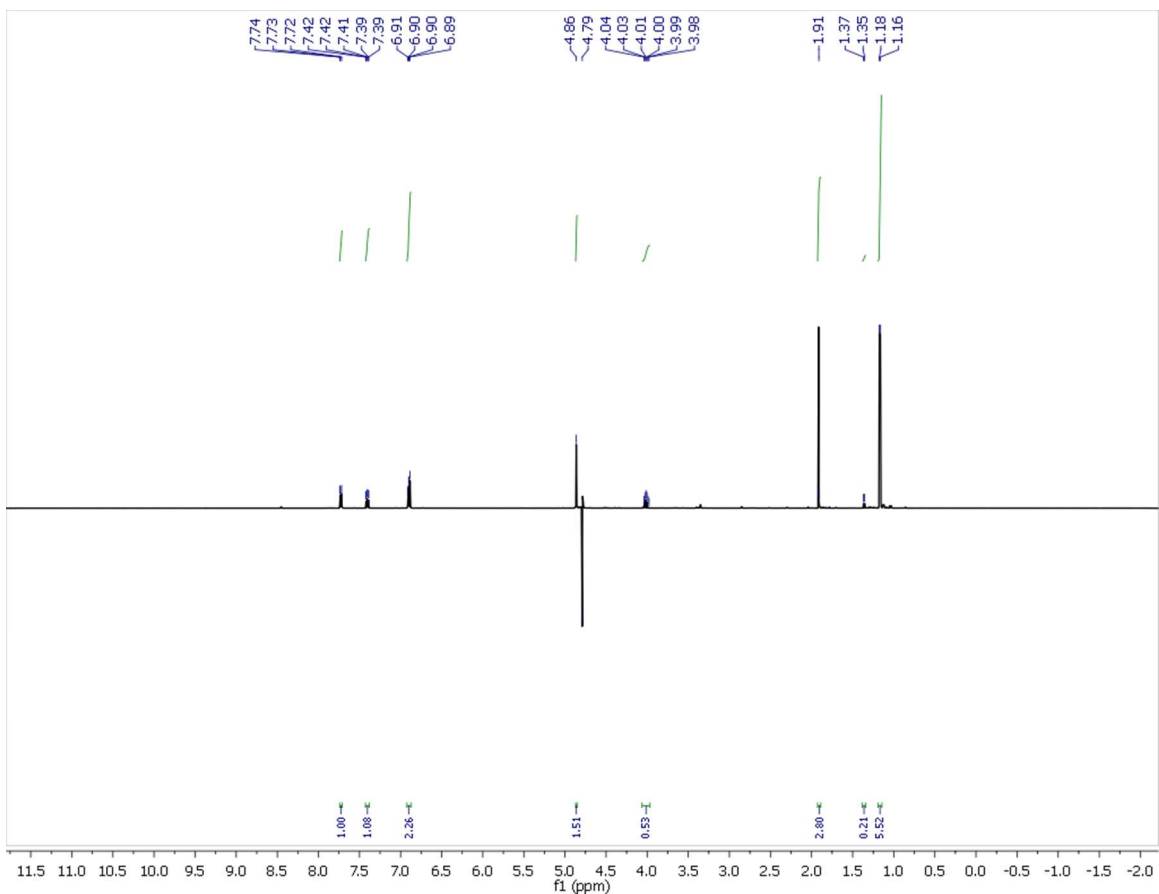

**Figure S1.** NMR spectra of products generated on hydrolysis of IPA/NO-aspirin after 24 h at pH 10 and 37 °C.

The hydrolysis products of IPA/NO-aspirin were examined by NMR at pH 10 after 24 h of incubation. Accumulation of isopropanol ( $\delta$  1.18), formaldehyde (4.86), salicylate ( $\delta$  6.89-6.91, 7.39-7.42, 7.72-7.74) and acetate ( $\delta$  1.91) is evident. Notably the hydrolysis was complete as apparent from the lack of linker  $-\text{OCH}_2\text{O}-$  protons peak at around 6 ppm. A lack of acetyl  $\text{CH}_3$  protons ( $\delta$  2.33) suggests negligible accumulation of aspirin. The near lack of isopropylamine ( $\delta$  1.07), the byproduct of the NO forming pathway (Scheme 1), indicates decomposition of IPA/NO-aspirin primarily by the pathway involving deprotonation of the amine (Scheme 3).

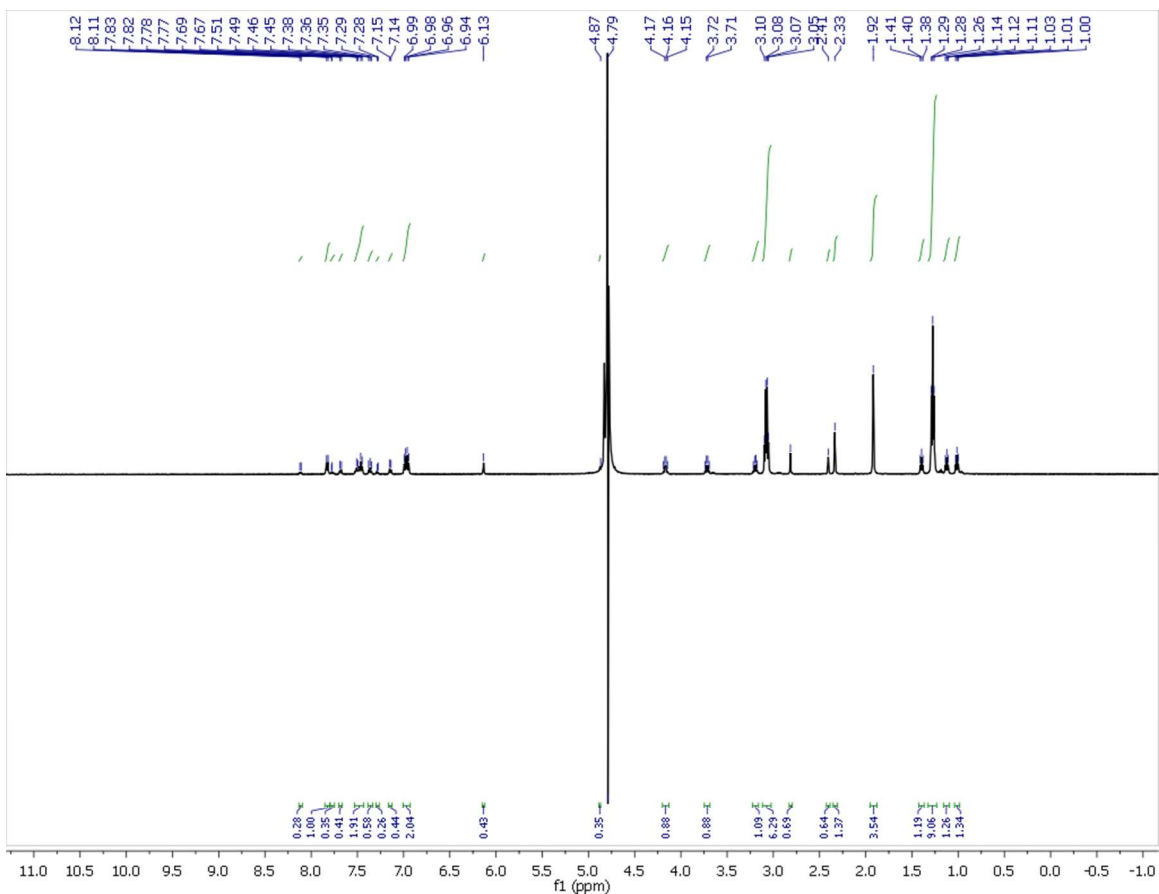

**Figure S2.** NMR spectra of products generated on hydrolysis of DEA/NO-aspirin after 90 h at pH 10 and 37 °C.

DEA/NO decomposes at pH 10 to produce peaks at 4.17, 3.72, 1.38, 1.27, and 1.12 ppm. These peaks are also present in the NMR spectrum collected after 90 h hydrolysis of DEA/NO-aspirin at pH 10, signifying release of free DEA/NO. The 1.9 ppm peak indicates hydrolysis of the acetyl ester to form acetate. Moreover small peaks for the OCH<sub>2</sub>O linker (6.13 ppm) and acetyl group (2.41 ppm) of DEA/NO-aspirin were still present, suggesting incomplete hydrolysis. Although the peak at 2.33 ppm hints at the presence of aspirin, the overlapping peaks in the aromatic region hampers assignment of DEA/NO-salicylate, aspirin or salicylate.

### Assessment of compound purity by HPLC

Compounds **3** and **6-8** were determined by HPLC to have a purity of >95%, and thus were used for subsequent biological assays. The HPLC spectra are provided below.

Column: Phenomenex Luna C18 column, 3  $\mu\text{m}$ , 150  $\times$  2.1 mm; mobile phase: water and acetonitrile gradient containing 0.1% formic acid; wavelength: 265 nm; rate: 0.2 mL/min; temperature: 30  $^{\circ}\text{C}$

### Compound **3**, 98.1%

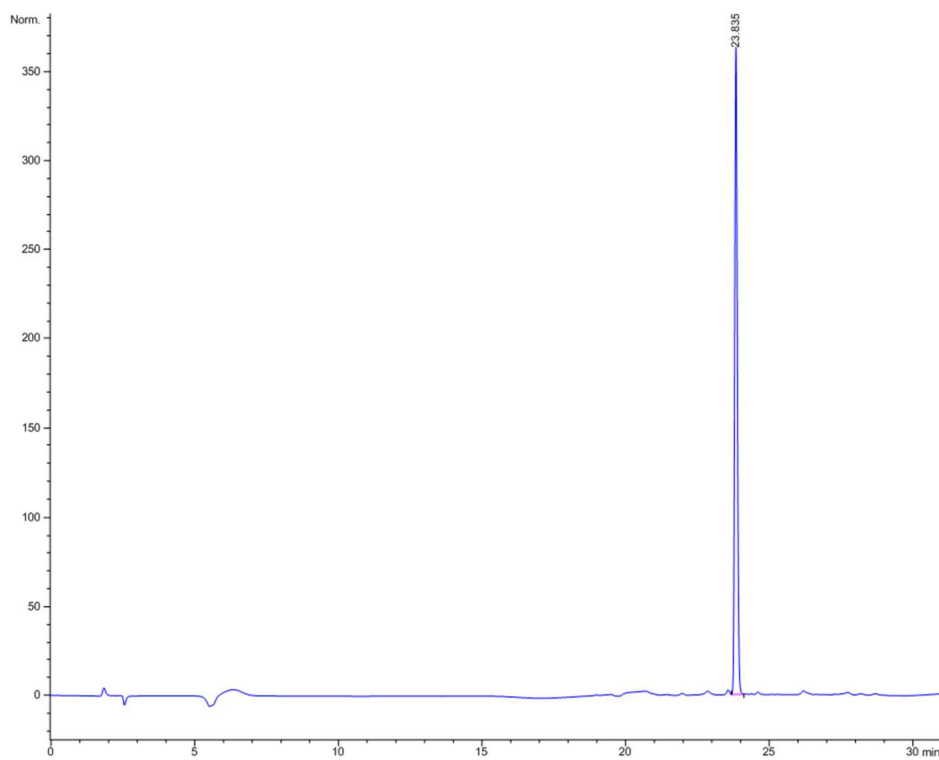

**Compound 6, 97.4%**

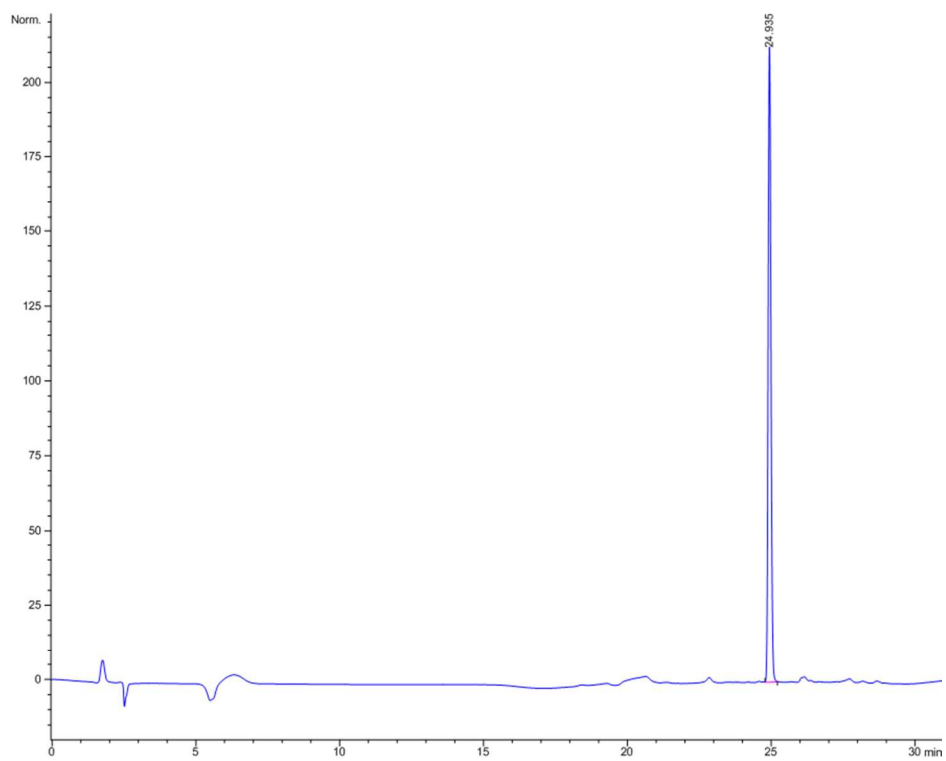

**Compound 7, 97.6%**

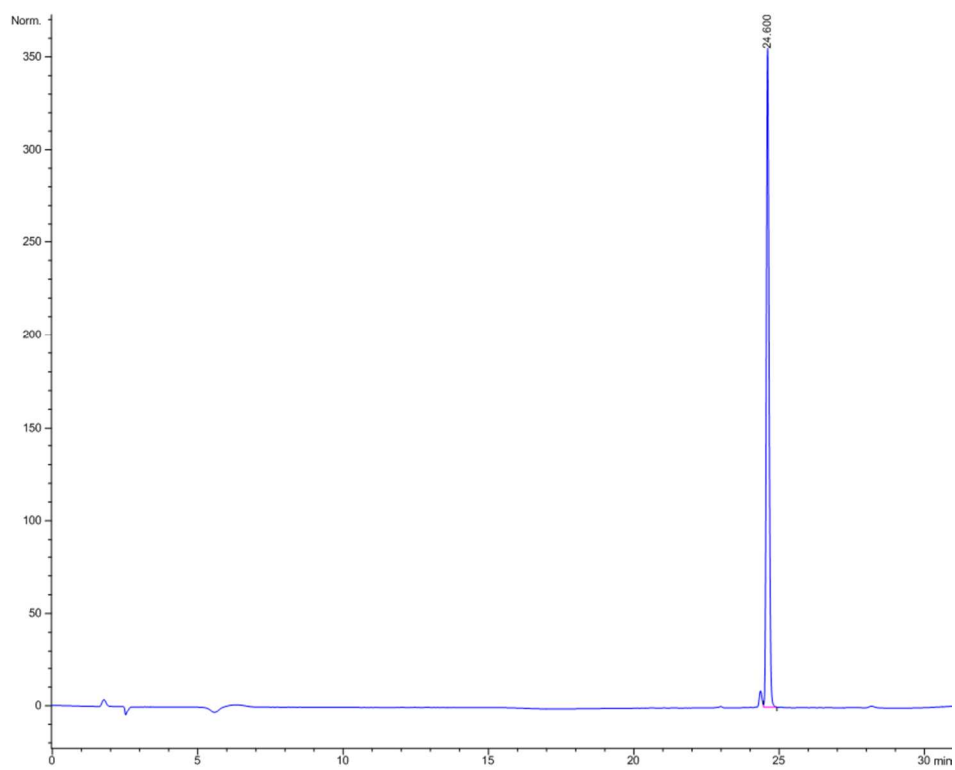

**Compound 8, 99.2%**

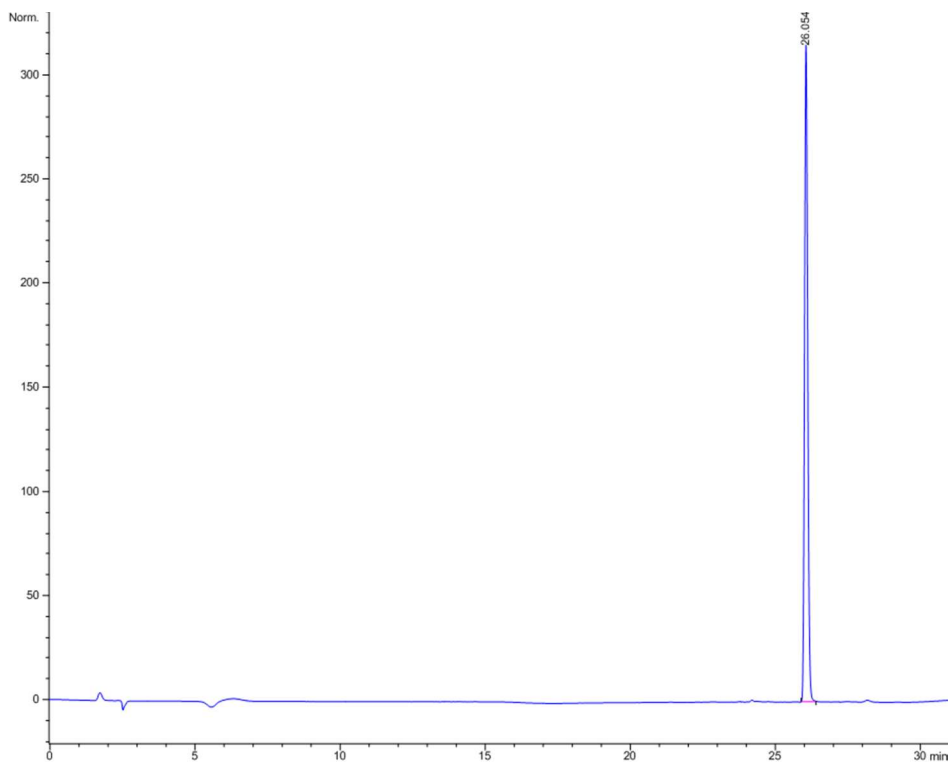

Supplement: NIHMS528488-supplement-1_si_001.pdf [file NIHMS528488-supplement-1_si_001.pdf]
